# Supplementary material
Source: Springer Nature journal article supplement (https://www.springermedizin.de/resource/supplementary/13045_2009_44_MOESM6_ESM.pdf/9660540)

1 2 3 4 5 6 7 8

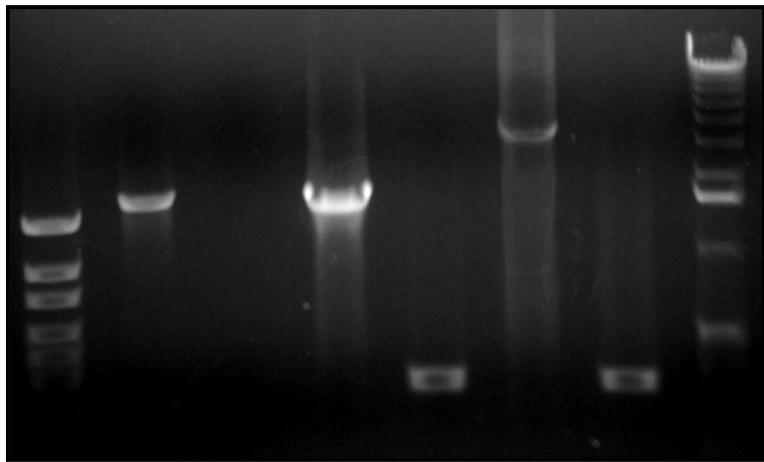

← 3481 bp

← 1757 bp

← 349 bp

Allele:

1

1

1

2

2

2

Genotype:

1-1

2-1

2-2

Supplement: MOESM6 [file 9660540]
